# Supplementary material for: Multiphase boudinage: a case study of amphibolites in marble in the Naxos migmatite core
Source: Copernicus journal article supplement (doi:10.5194/se-9-91-2018), 2018-02-15
Supplement: Supplementary file 1 [file se-9-91-2018-supplement.zip]

Archive with 2 entries (2 files):
- structural raw data Naxos.csv
- se-9-91-2018-supplement-title-page.pdf
