# Supplementary material for: Multiphase boudinage: a case study of amphibolites in marble in the Naxos migmatite core
Source: Copernicus journal article supplement (doi:10.5194/se-9-91-2018), 2018-02-15
Supplement: Supplementary file 1 [file se-9-91-2018-supplement.zip › se-9-91-2018-supplement-title-page.pdf]

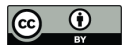

## *Supplement of*

# **Multiphase boudinage: a case study of amphibolites in marble in the Naxos migmatite core**

**Simon Virgo et al.**

*Correspondence to:* Simon Virgo ([s.virgo@ged.rwth-aachen.de](mailto:s.virgo@ged.rwth-aachen.de))

- [se-9-91-2018-supplement-title-page.pdf](#)
- [structural raw data Naxos.csv](#)

The copyright of individual parts of the supplement might differ from the CC BY 4.0 License.
