# Supplementary material for: Multiphase boudinage: a case study of amphibolites in marble in the Naxos migmatite core
Source: Copernicus journal article supplement (doi:10.5194/se-9-91-2018), 2018-02-15
Supplement: Supplementary file 1 [file se-9-91-2018-supplement.zip › structural raw data Naxos.csv]

outcrop Number	internal Location ID	type	Trend/dip direction	Plunge/dip	linear/plane
1	Loc 2-8a	Amphibolite	256	80	plane
1	Loc 2-8a	hairline veins	350	39	plane
2	Loc 2-8	Fold axis	220	75	linear
2	Loc 2-8	blocky mode I linear	251	74	linear
2	Loc 2-8	blocky mode I linear	222	70	linear
2	Loc 2-8	Amphibolite	258	70	plane
2	Loc 2-8	Amphibolite	231	75	plane
2	Loc 2-8	Amphibolite	250	76	plane
2	Loc 2-8	long joint	357	55	plane
3	Loc 2-10	PS	342	20	linear
3	Loc 2-10	blocky mode-I	172	90	plane
3	Loc 2-10	Amphibolite	272	56	plane
4	Loc 2-7	Fold axis	205	45	linear
4	Loc 2-7	Fold axis	195	35	linear
4	Loc 2-7	PS 1 long wavelength	194	15	linear
4	Loc 2-7	PS 2 short wavelength	190	30	linear
4	Loc 2-7	PS 2 short wavelength	185	26	linear
4	Loc 2-7	fold axial plane	276	70	plane
4	Loc 2-7	blocky mode-I with chlorite	186	65	plane
4	Loc 2-7	blocky mode-I with chlorite	185	63	plane
4	Loc 2-7	Amphibolite	271	85	plane
4	Loc 2-7	Amphibolite	272	84	plane
5	Loc 2-6c	PS 1 long wavelength	194	15	linear
5	Loc 2-6c	PS 2 short wavelength	180	36	linear
5	Loc 2-6c	PS 2 short wavelength	180	44	linear
5	Loc 2-6c	biotite vein	190	60	linear
5	Loc 2-6c	clockwise blocky shear	220	79	plane
5	Loc 2-6c	clockwise blocky shear	222	87	plane
5	Loc 2-6c	clockwise blocky shear	234	81	plane
5	Loc 2-6c	micashist contact	280	80	plane
5	Loc 2-6c	Amphibolite	270	80	pLane
5	Loc 2-6c	Amphibolite	272	80	pLane
5	Loc 2-6c	chlorite vein in marble	4	60	plane
5	Loc 2-6c	chlorite vein in marble	5	55	plane
5	Loc 2-6c	reverse fault	325	56	plane
5	Loc 2-6c	long joint	354	60	plane
6	Loc 2-6a	PS 1 long wavelength	356	35	linear
6	Loc 2-6a	PS 2 short wavelength	179	46	linear
6	Loc 2-6a	chlorite hairline veins	355	64	plane
6	Loc 2-6a	Amphibolite	261	65	plane
6	Loc 2-6a	fault (normal)	356	75	plane
8	Loc 2-6b	Fold axis	175	65	linear
8	Loc 2-6b	PS 1 long wavelength	176	3	linear
8	Loc 2-6b	PS 2 short wavelength	176	29	linear
8	Loc 2-6b	blocky mode I linear	356	80	linear
8	Loc 2-6b	blocky mode I linear	176	84	linear
8	Loc 2-6b	Amphibolite	266	84	plane
8	Loc 2-6b	Amphibolite	268	80	plane
9	Loc 2-3	PS 1 long wavelength	10	14	linear
9	Loc 2-3	PS 1 long wavelength	6	9	linear
9	Loc 2-3	PS 2 short wavelength	196	35	linear
9	Loc 2-3	PS 2 short wavelength	196	24	linear
9	Loc 2-3	older blocky mode-I	12	90	plane
9	Loc 2-3	older blocky mode-I	15	86	plane
9	Loc 2-3	older blocky mode-I	14	90	plane
9	Loc 2-3	younger blocky mode-I	226	75	plane
9	Loc 2-3	younger blocky mode-I	221	60	plane
9	Loc 2-3	younger blocky mode-I	203	67	plane
9	Loc 2-3	Amphibolite	106	70	plane
9	Loc 2-3	Amphibolite	110	66	plane
9	Loc 2-3	Amphibolite	284	84	plane
12	Loc 2-2	PS 2 short wavelength	161	35	linear
12	Loc 2-2	blocky mode-I	171	90	plane
12	Loc 2-2	Amphibolite	75	90	plane
13	Loc 2-2a	Fold axis (2b)	124	35	linear
13	Loc 2-2a	PS 1 long wavelength	8	6	linear
13	Loc 2-2a	PS 1 long wavelength	0	10	linear
13	Loc 2-2a	PS 1 long wavelength	6	16	linear
13	Loc 2-2a	PS 2 short wavelength	164	19	linear
13	Loc 2-2a	PS 2 short wavelength	166	15	linear
13	Loc 2-2a	blocky mode I linear	110	56	linear
13	Loc 2-2a	blocky mode I linear	108	55	linear
13	Loc 2-2a	clockwise blocky shear	34	64	plane
13	Loc 2-2a	Amphibolite	85	55	plane
13	Loc 2-2a	Amphibolite	84	55	plane
13	Loc 2-2a	Amphibolite	84	70	plane
13	Loc 2-2a	Amphibolite	86	66	plane
14	Loc 12	Linear PS 1 long wavelength	2	17	linear
14	Loc 12	Linear PS 2 short wavelength	174	24	linear
14	Loc 12	Linear PS 2 short wavelength	171	21	linear
14	Loc 12	older long blocky linears	74	75	linear
14	Loc 12	older long blocky linears	71	70	linear
14	Loc 12	older long blocky linears	74	64	linear
14	Loc 12	younger short blocky linears	154	44	linear
14	Loc 12	younger short blocky linears	139	46	linear
14	Loc 12	younger short blocky linears	135	46	linear
14	Loc 12	Amphibolite	85	65	plane
14	Loc 12	Amphibolite	82	74	plane
14	Loc 12	Amphibolite	86	73	plane
14	Loc 12	Amphibolite	79	75	plane
14	Loc 12	older long Blocky	351	86	plane
14	Loc 12	older long Blocky	173	83	plane
14	Loc 12	older long Blocky	350	87	plane
15	Loc 2-1	PS 1 long wavelength	3	25	linear
15	Loc 2-1	PS 1 long wavelength	11	24	linear
15	Loc 2-1	blocky	213	80	plane
15	Loc 2-1	Amphibolite	90	55	plane
15	Loc 2-1	Amphibolite	95	54	plane
15	Loc 2-1	Amphibolite	90	65	plane
15	Loc 2-1	Amphibolite	76	56	plane
15	Loc 2-1	Amphibolite	79	56	plane
15	Loc 2-1	reverse fault	312	45	plane
15	Loc 2-1	premetamorphic fault	105	64	plane
15	Loc 2-1	hairline veins	346	64	plane
16	Loc 8	Fold axis	14	60	linear
16	Loc 8	PS	29	69	linear
16	Loc 8	PS	27	63	linear
16	Loc 8	Amphibolite	76	76	PLane
16	Loc 8	Amphibolite	82	79	Plane
16	Loc 8	bright veins (blocky)	4	86	plane
16	Loc 8	bright veins (blocky)	1	87	plane
16	Loc 8	biotite konretions close to hinge	22	81	plane
16	Loc 8	biotite konretions close to hinge	189	85	plane
16	Loc 8	late brown joints	346	69	plane
16	Loc 8	late brown joints	2	74	plane
17	Loc 7	Amphibolite	83	80	plane
17	Loc 7	Amphibolite	81	89	plane
18	Loc 2-9a	PS 1 long wavelength	0	3	linear
18	Loc 2-9a	PS 2 short wavelength	180	22	linear
18	Loc 2-9a	PS 2 short wavelength	180	24	linear
18	Loc 2-9a	blocky mode I linear	180	80	linear
18	Loc 2-9a	anticlockwise blocky shear	180	50	linear
18	Loc 2-9a	Amphibolite	90	82	plane
19	Loc 11	Fold axis	212	60	linear
19	Loc 11	Pegmatite	282	84	plane
19	Loc 11	Amphibolite	259	82	plane
19	Loc 11	Amphibolite	241	74	plane
19	Loc 11	Foliation West limb	277	89	plane
19	Loc 11	Foliation West limb	248	72	plane
19	Loc 11	Foliation West limb	273	80	plane
19	Loc 11	Foliation East limb	242	67	plane
22	Loc 9	"fat" PS	16	15	linear
22	Loc 9	Amphibolite	273	90	plane
22	Loc 9	thin PS +biotite fill	197	66	plane
22	Loc 9	thin PS +biotite fill	187	59	plane
22	Loc 9	biotite vein	179	70	plane
23	Loc 10	Amphibolite (strike on floor)	12	0	linear
23	Loc 10	Amphibolite (strike on floor)	192	0	linear
23	Loc 10	blocky shear dextral (strike on floor)	140	0	linear
23	Loc 10	blocky shear dextral (strike on floor)	320	0	linear
23	Loc 10	hairlines (strike on floor)	95	0	linear
23	Loc 10	hairlines (strike on floor)	275	0	linear
24	Loc 6	Linear PS1	181	5	linear
24	Loc 6	Linear PS2 in PS1 necks	180	35	linear
24	Loc 6	Linear PS2 in PS1 necks	181	27	linear
24	Loc 6	Fault slickensides	261	55	linear
24	Loc 6	Fault slickensides	264	36	linear
24	Loc 6	outcrop wall	96	86	plane
24	Loc 6	outcrop wall	94	90	plane
24	Loc 6	B1 Blocky shearplanes with slip	147	60	plane
24	Loc 6	B1 Blocky shearplanes with slip	138	51	plane
24	Loc 6	B1 Blocky shearplanes with slip	149	51	plane
24	Loc 6	B1 Blocky shearplanes with slip	146	50	plane
24	Loc 6	B2 Blocky 2 steep	161	79	plane
24	Loc 6	B2 Blocky 2 steep	166	80	plane
24	Loc 6	B2 Blocky 2 steep	163	67	plane
24	Loc 6	B2 Blocky 2 steep	181	79	plane
24	Loc 6	Faults	333	66	plane
24	Loc 6	Faults	26	81	plane
24	Loc 6	Faults	338	67	plane
25	Loc 3	blocky with dextral slip	219	70	plane
25	Loc 3	blocky with dextral slip	221	70	plane
25	Loc 3	blocky with dextral slip	36	66	plane
25	Loc 3	blocky with dextral slip	29	80	plane
25	Loc 3	blocky	189	52	plane
25	Loc 3	blocky	190	51	plane
25	Loc 3	Amphibolite	284	90	plane
25	Loc 3	Amphibolite	275	89	plane
25	Loc 3	Amphibolite	279	89	plane
25	Loc 3	Amphibolite	284	89	plane
26	Loc 4	Fold axis	30	62	linear
28	Loc 2-9b	PS 1 long wavelength	183	30	linear
28	Loc 2-9b	PS 2 short wavelength	185	44	linear
28	Loc 2-9b	blocky mode-I	4	70	plane
28	Loc 2-9b	Foliation	100	90	plane
28	Loc 2-9b	chlorite hairline veins	356	56	plane
28	Loc 2-9b	Amphibolite	265	85	plane
28	Loc 2-9b	Amphibolite	84	87	plane
29	Loc 2-9c	PS 1 long wavelength	8	15	linear
29	Loc 2-9c	PS 1 long wavelength	14	8	linear
29	Loc 2-9c	blocky mode I linear	354	82	linear
29	Loc 2-9c	blocky shear linear	27	57	linear
29	Loc 2-9c	Amphibolite	112	87	plane
29	Loc 2-9c	Amphibolite	288	86	plane
30	Loc 2-12	shear zone in marble	262	84	plane
31	Loc 2-4	PS 1 long wavelength	10	4	linear
31	Loc 2-4	blocky mode-I	222	89	plane
31	Loc 2-4	blocky mode-I	176	89	plane
31	Loc 2-4	blocky mode-I	187	90	plane
31	Loc 2-4	anticlockwise blocky shear	340	90	plane
31	Loc 2-4	anticlockwise blocky shear	160	86	plane
31	Loc 2-4	Amphibolite	96	86	plane
31	Loc 2-4	Amphibolite	98	85	plane
31	Loc 2-4	Amphibolite	88	86	plane
32	Loc 2-5c	Fold axis	158	20	linear
32	Loc 2-5c	PS 2 short wavelength	171	20	linear
32	Loc 2-5c	blocky mode-I	348	83	plane
32	Loc 2-5c	anticlockwise blocky shear	165	68	plane
32	Loc 2-5c	Amphibolite	96	60	plane
32	Loc 2-5c	Amphibolite	76	85	plane
33	Loc 2-5b	PS 1 long wavelength	173	15	linear
33	Loc 2-5b	PS 1 long wavelength	186	10	linear
33	Loc 2-5b	PS 2 short wavelength	169	35	linear
33	Loc 2-5b	PS 2 short wavelength	173	32	linear
33	Loc 2-5b	blocky mode-I	7	77	plane
33	Loc 2-5b	Amphibolite	98	65	plane
33	Loc 2-5b	Amphibolite	99	64	plane
34	Loc 2-5a	PS 2 short wavelength	176	36	linear
34	Loc 2-5a	PS 2 short wavelength	176	36	linear
34	Loc 2-5a	blocky mode-I	355	82	plane
34	Loc 2-5a	anticlockwise blocky shear	165	81	plane
34	Loc 2-5a	anticlockwise blocky shear	152	84	plane
34	Loc 2-5a	Amphibolite	94	56	plane
34	Loc 2-5a	Amphibolite	99	55	plane
0	Loc 2-11	PS	166	9	linear
0	Loc 2-11	blocky mode I linear	242	70	linear
0	Loc 2-11	Amphibolite	264	70	plane
0	Loc 2-11	Amphibolite	71	83	plane
